# Supplementary material
Source: PubMed Central journal article supplement (PMC6764519)
Supplement: NIHMS1037889-supplement-Supplemental_Material.pdf [file NIHMS1037889-supplement-Supplemental_Material.pdf]

Supplemental materials for submitted article, “Diverse Diagnostic Profiles Associated with Prescription Opioid Use Disorder in a Nationwide Sample: One Crisis, Multiple Needs”

Table S1

*Observed Values for Bayesian Information Criterion and Entropy for All Models Considered*

*During the Class Enumeration Process*

| Number of Classes | BIC        | Difference in BIC<br>from Prior Class Model | Entropy |
|-------------------|------------|---------------------------------------------|---------|
| 1                 | 272101.16  | -                                           | -       |
| 2                 | 248076.793 | 24024.37                                    | 0.78    |
| 3                 | 244509.742 | 3567.05                                     | 0.81    |
| 4                 | 241922.672 | 2587.07                                     | 0.76    |
| 5                 | 240972.493 | 950.18                                      | 0.77    |
| 6                 | 240438.528 | 533.96                                      | 0.77    |
| 7                 | 240259.143 | 179.38                                      | 0.75    |
| 8                 | 240122.765 | 136.38                                      | 0.75    |
| 9                 | 240119.934 | 2.83                                        | 0.77    |
| 10                | 240106.062 | 13.87                                       | 0.77    |
| 11                | 240134.28  | -28.22                                      | 0.77    |
| 12                | 240192.163 | -57.88                                      | 0.79    |

*Note.* BIC=Bayesian Information Criterion

Table S2

*Class Membership as a Predictor of Functional Impairment*

| Scale                            | Class | Qualitative Description                 | P-ODD Rate | Mean Score | X <sup>2</sup> | p-value <sup>a</sup> |
|----------------------------------|-------|-----------------------------------------|------------|------------|----------------|----------------------|
| SF-12 Physical Component Summary | 1     | Mentally Healthy                        | Low        | 50.66      | NA             | NA                   |
|                                  | 2     | Depressed                               | Low        | 45.59      | 37.21          | <.001                |
|                                  | 3     | Alcohol-Tobacco                         | Low        | 46.84      | 63.36          | <.001                |
|                                  | 4     | Alcohol-Tobacco-Cocaine                 | Elevated   | 39.28      | 41.45          | <.001                |
|                                  | 5     | Internalizing                           | Elevated   | 45.46      | 25.67          | <.001                |
|                                  | 6     | Bipolar                                 | Elevated   | 47.52      | 16.16          | <.001                |
|                                  | 7     | Polysubstance/Elevated Psychopathology  | Very High  | 48.12      | 15.15          | <.001                |
|                                  | 8     | Polysubstance/Very High Psychopathology | Very High  | 49.53      | 11.07          | 0.001                |
| SF-12 Mental Component Summary   | 1     | Mentally Healthy                        | Low        | 53.71      | NA             | NA                   |
|                                  | 2     | Depressed                               | Low        | 38.46      | 465.13         | <.001                |
|                                  | 3     | Alcohol-Tobacco                         | Low        | 45.63      | 531.79         | <.001                |
|                                  | 4     | Alcohol-Tobacco-Cocaine                 | Elevated   | 32.41      | 184.67         | <.001                |
|                                  | 5     | Internalizing                           | Elevated   | 44.61      | 74.88          | <.001                |
|                                  | 6     | Bipolar                                 | Elevated   | 40.49      | 299.80         | <.001                |
|                                  | 7     | Polysubstance/Elevated Psychopathology  | Very High  | 42.24      | 299.20         | <.001                |
|                                  | 8     | Polysubstance/Very High Psychopathology | Very High  | 50.63      | 94.90          | <.001                |
| SF-12 Bodily Pain Scale          | 1     | Mentally Healthy                        | Low        | 51.84      | NA             | NA                   |
|                                  | 2     | Depressed                               | Low        | 41.82      | 98.72          | <.001                |
|                                  | 3     | Alcohol-Tobacco                         | Low        | 45.17      | 195.31         | <.001                |
|                                  | 4     | Alcohol-Tobacco-Cocaine                 | Elevated   | 34.99      | 86.43          | <.001                |
|                                  | 5     | Internalizing                           | Elevated   | 43.51      | 51.82          | <.001                |
|                                  | 6     | Bipolar                                 | Elevated   | 43.20      | 86.59          | <.001                |
|                                  | 7     | Polysubstance/Elevated Psychopathology  | Very High  | 44.87      | 79.66          | <.001                |
|                                  | 8     | Polysubstance/Very High Psychopathology | Very High  | 49.24      | 66.79          | <.001                |

*Note:* SF-12= Short Form Health Survey Version 2 (Ware et al., 2002)

<sup>a</sup>No *p*-values are available for class 1, as this was the reference class to which all other classes were compared. All observed *p*-values were significant after false discovery rate adjustment.
